# Supplementary material
Source: publisher figshare collection journal article supplement (https://acs.figshare.com/ndownloader/files/4374403)
Supplement: Supplementary file 1 [file 4374403]

Supplementary Information (3 pages)

Additional information on the data calculated for use in the study.

The following information is provided to the article in Environmental Science and  
Technology on  
Determination of the Internal Chemical Energy of Wastewater

by

**E.S. Heidrich\*, T.P. Curtis and J. Dolfing**

School of Civil Engineering and Geosciences, Newcastle University, Newcastle  
upon Tyne NE1 7RU, UK

\* Corresponding author phone: +44 (0)191 222 6323, fax: +44 (0)191 222 6502,  
email: e.s.heidrich@newcastle.ac.uk.

This document was prepared on 15<sup>th</sup> November 2010

Page S-2: TABLE S-1: List of common organic compounds and their derived energy  
per gCOD values

Page S-3: S-2 Energy Calculations made from Shizas and Bagley's (3) data compared  
to those made in this paper.

TABLE S-1: List of common organic compounds and their derived energy per gCOD values

| Compound               | Formula                                                                           | $\Delta H/\text{gCOD}$ |
|------------------------|-----------------------------------------------------------------------------------|------------------------|
| Benzene                | $\text{C}_6\text{H}_6$                                                            | 10.2                   |
| Linoleic acid          | $\text{C}_{18}\text{H}_{32}\text{O}_2$                                            | 13.4                   |
| Benzoic acid           | $\text{C}_6\text{H}_5\text{COOH}$                                                 | 13.4                   |
| Myristic acid          | $\text{CH}_3(\text{CH}_2)_{12}\text{CO}_2\text{H}$                                | 13.6                   |
| Lauric acid            | $\text{CH}_3(\text{CH}_2)_{10}\text{CO}_2\text{H}$                                | 13.6                   |
| Acetic acid            | $\text{CH}_3\text{COOH}$                                                          | 13.6                   |
| Phenol                 | $\text{C}_6\text{H}_5\text{OH}$                                                   | 13.6                   |
| Palmitic Acid          | $\text{CH}_3(\text{CH}_2)_{14}\text{CO}_2\text{H}$                                | 13.6                   |
| Oleic acid             | $\text{CH}_3(\text{CH}_2)_7\text{CH}=\text{CH}(\text{CH}_2)_7\text{CO}_2\text{H}$ | 13.7                   |
| Methane                | $\text{CH}_4$                                                                     | 13.9                   |
| Ethane                 | $\text{C}_2\text{H}_6$                                                            | 13.9                   |
| Lactic acid            | $\text{CH}_3\text{CH}(\text{OH})\text{COOH}$                                      | 14.0                   |
| Ethanol                | $\text{C}_2\text{H}_5\text{OH}$                                                   | 14.3                   |
| Glucose                | $\text{C}_6\text{H}_{12}\text{O}_6$                                               | 14.3                   |
| Propene                | $\text{C}_3\text{H}_6$                                                            | 14.3                   |
| Cyclopropane           | $\text{C}_3\text{H}_6$                                                            | 14.5                   |
| Ethanal                | $\text{CH}_3\text{CHO}$                                                           | 14.6                   |
| Ethene                 | $\text{C}_2\text{H}_4$                                                            | 14.7                   |
| Sucrose                | $\text{C}_{12}\text{H}_{22}\text{O}_{11}$                                         | 14.7                   |
| Methanol               | $\text{CH}_3\text{OH}$                                                            | 15.1                   |
| Chloroethylene         | $\text{C}_2\text{H}_3\text{Cl}$                                                   | 15.7                   |
| Oxalic acid            | $(\text{COOH})_2$                                                                 | 15.9                   |
| Formic acid            | $\text{HCOOH}$                                                                    | 15.9                   |
| Ethyne                 | $\text{C}_2\text{H}_2$                                                            | 16.3                   |
| Hexachlorobenzene      | $\text{C}_6\text{Cl}_6$                                                           | 16.5                   |
| Dichloroethylene (1,1) | $\text{C}_2\text{H}_2\text{Cl}_2$                                                 | 17.1                   |
| Dichloroethylene (1,2) | $\text{C}_2\text{H}_2\text{Cl}_2$                                                 | 17.2                   |
| Methanal               | $\text{HCHO}$                                                                     | 17.8                   |
| Trichloroethylene      | $\text{C}_2\text{HCl}_3$                                                          | 20.0                   |
| Teterachloroethylene   | $\text{C}_2\text{Cl}_4$                                                           | 26.0                   |
| Chloroform             | $\text{CHCl}_3$                                                                   | 29.1                   |
| Trichloroacetic acid   | $\text{CCl}_3\text{COOH}$                                                         | 30.4                   |

S-2 Energy Calculations made from Shizas and Bagley's (3) data compared to those made in this paper.

Shizas and Bagley (3) use a sample of municipal wastewater which prior to drying contains 431 mg/L COD. This sample is then oven dried to give a total solids measurement of 1980 mg/L. The dried sample is used in a bomb calorimeter giving 3.2 kJ/g dried weight.

Calculations derived from this data cited in various papers (5, 7-9, 14):

$$3.2 \text{ kJ/g} \times 1.98 \text{ g/L} = 6.3 \text{ kJ/L wastewater}$$

$$6.3 \text{ kJ/L} \times \frac{1}{0.431 \text{ gCOD/L}} = 14.7 \text{ kJ/gCOD}$$

If the exercise is repeated on the data from the present paper using the oven dried samples and the measurement taken for COD prior to drying the results would have been:

Cramlington

$$8.3 \text{ kJ/L} \times \frac{1}{0.718 \text{ gCOD/L}} = 11.6 \text{ kJ/gCOD}$$

Hendon

$$5.6 \text{ kJ/L} \times \frac{1}{0.576 \text{ gCOD/L}} = 9.9 \text{ kJ/gCOD}$$

This is an underestimation of 60% and 45% respectively.
